# Supplementary material for: Spatial and temporal patterns of Ross River virus in south east Queensland, Australia: identification of hot spots at the rural-urban interface
Source: PubMed Central journal article supplement (PMC7530966; doi:10.1186/s12879-020-05411-x), 2020-10-02
Supplement: 12879_2020_5411_MOESM2_ESM.pdf [file 12879_2020_5411_MOESM2_ESM.pdf]

**Table S2. Summary of annual case counts for each Local Government Area (LGA).**

| <b>LGA name</b>       | <b>2001</b> | <b>2002</b> | <b>2003</b>  | <b>2004</b>  | <b>2005</b> | <b>2006</b>  | <b>2007</b> | <b>2008</b>  | <b>2009</b> | <b>2010</b>  | <b>2011</b> | <b>2012</b> | <b>2013</b> | <b>2014</b>  | <b>2015</b>  | <b>2016</b> | <b>Grand Total</b> |
|-----------------------|-------------|-------------|--------------|--------------|-------------|--------------|-------------|--------------|-------------|--------------|-------------|-------------|-------------|--------------|--------------|-------------|--------------------|
| Brisbane City         | 325         | 39          | 363          | 342          | 74          | 454          | 239         | 418          | 224         | 299          | 168         | 292         | 231         | 272          | 1,477        | 135         | <b>5,352</b>       |
| Gold Coast City       | 106         | 21          | 153          | 99           | 37          | 153          | 125         | 138          | 121         | 122          | 61          | 102         | 107         | 164          | 636          | 107         | <b>2,252</b>       |
| Ipswich City          | 28          | 11          | 52           | 92           | 6           | 80           | 47          | 76           | 54          | 66           | 45          | 44          | 41          | 65           | 300          | 37          | <b>1,044</b>       |
| Logan City            | 95          | 11          | 145          | 99           | 24          | 117          | 68          | 111          | 60          | 60           | 30          | 59          | 48          | 59           | 424          | 46          | <b>1,456</b>       |
| Moreton Bay Region    | 150         | 26          | 289          | 176          | 73          | 212          | 190         | 229          | 160         | 186          | 112         | 175         | 160         | 182          | 672          | 105         | <b>3,097</b>       |
| Noosa Shire           | 29          | 12          | 161          | 48           | 26          | 35           | 36          | 63           | 46          | 68           | 15          | 44          | 34          | 85           | 103          | 45          | <b>850</b>         |
| Redland City          | 97          | 13          | 69           | 33           | 17          | 49           | 70          | 64           | 37          | 61           | 44          | 51          | 40          | 47           | 255          | 44          | <b>991</b>         |
| Scenic Rim Region     | 7           | 4           | 22           | 41           | 5           | 42           | 13          | 24           | 12          | 31           | 14          | 15          | 14          | 10           | 122          | 17          | <b>393</b>         |
| Sunshine Coast Region | 98          | 41          | 342          | 111          | 64          | 123          | 143         | 205          | 195         | 234          | 89          | 123         | 109         | 236          | 399          | 168         | <b>2,680</b>       |
| <b>Total</b>          | <b>935</b>  | <b>178</b>  | <b>1,596</b> | <b>1,041</b> | <b>326</b>  | <b>1,265</b> | <b>931</b>  | <b>1,328</b> | <b>909</b>  | <b>1,127</b> | <b>578</b>  | <b>905</b>  | <b>784</b>  | <b>1,120</b> | <b>4,388</b> | <b>704</b>  | <b>18,115</b>      |
