# Supplementary material for: Spatial and temporal patterns of Ross River virus in south east Queensland, Australia: identification of hot spots at the rural-urban interface
Source: PubMed Central journal article supplement (PMC7530966; doi:10.1186/s12879-020-05411-x), 2020-10-02
Supplement: 12879_2020_5411_MOESM4_ESM.pdf [file 12879_2020_5411_MOESM4_ESM.pdf]

**Table S4. Locations with the highest overall rates across all years, 2001-2016.**

| LGA name              | SSC name          | Urban/rural classification <sup>1</sup> | Average population <sup>2</sup> | Population density (persons/km <sup>2</sup> ) | Total cases (2001-2016) | Mean raw annual incidence rate* | Mean smoothed annual incidence rate* |
|-----------------------|-------------------|-----------------------------------------|---------------------------------|-----------------------------------------------|-------------------------|---------------------------------|--------------------------------------|
| Ipswich City          | Amberley          | Rural Balance                           | 222                             | 8                                             | 24                      | 676                             | 562                                  |
| Noosa Shire           | Boreen Point      | Rural Balance                           | 287                             | 55                                            | 19                      | 413                             | 363                                  |
| Noosa Shire           | Noosa North Shore | Rural Balance                           | 157                             | 1                                             | 9                       | 359                             | 176                                  |
| Scenic Rim Region     | Woolooman         | Rural Balance                           | 20                              | 1                                             | 1                       | 310                             | 67                                   |
| Gold Coast City       | Gilberton         | Rural Balance                           | 22                              | 2                                             | 1                       | 285                             | 61                                   |
| Noosa Shire           | Cooroy            | Rural Balance                           | 3,323                           | 121                                           | 142                     | 267                             | 263                                  |
| Sunshine Coast Region | Kunda Park        | Major Urban                             | 24                              | 9                                             | 1                       | 264                             | 71                                   |
| Scenic Rim Region     | Kents Lagoon      | Rural Balance                           | 49                              | 5                                             | 2                       | 255                             | 147                                  |
| Noosa Shire           | Cooran            | Rural Balance                           | 1,423                           | 38                                            | 56                      | 246                             | 235                                  |
| Sunshine Coast Region | Eumundi           | Rural Balance                           | 1,947                           | 83                                            | 75                      | 241                             | 234                                  |
| Noosa Shire           | Pomona            | Rural Balance                           | 2,551                           | 48                                            | 98                      | 240                             | 237                                  |
| Scenic Rim Region     | Mount Edwards     | Rural Balance                           | 55                              | 4                                             | 2                       | 226                             | 125                                  |
| Sunshine Coast Region | Yandina           | Other Urban                             | 2,078                           | 136                                           | 72                      | 217                             | 207                                  |
| Sunshine Coast Region | Conondale         | Rural Balance                           | 752                             | 4                                             | 26                      | 216                             | 202                                  |
| Sunshine Coast Region | Elaman Creek      | Rural Balance                           | 60                              | 5                                             | 2                       | 210                             | 138                                  |
| Ipswich City          | Blacksoil         | Rural Balance                           | 91                              | 48                                            | 3                       | 206                             | 74                                   |
| Redland City          | Lamb Island       | Bounded Locality                        | 379                             | 273                                           | 12                      | 198                             | 0                                    |
| Moreton Bay Region    | Samsonvale        | Rural Balance                           | 517                             | 15                                            | 16                      | 193                             | 135                                  |
| Sunshine Coast Region | Kenilworth        | Rural Balance                           | 489                             | 3                                             | 15                      | 192                             | 173                                  |
| Redland City          | Point Lookout     | Rural Balance                           | 625                             | 139                                           | 19                      | 190                             | 177                                  |
| Scenic Rim Region     | Mutdapilly        | Rural Balance                           | 270                             | 6                                             | 8                       | 185                             | 139                                  |
| Scenic Rim Region     | Moogerah          | Rural Balance                           | 205                             | 1                                             | 6                       | 183                             | 123                                  |
| Sunshine Coast Region | Peachester        | Rural Balance                           | 1,189                           | 26                                            | 34                      | 179                             | 138                                  |
| Gold Coast City       | Norwell           | Rural Balance                           | 175                             | 7                                             | 5                       | 178                             | 98                                   |

| LGA name              | SSC name       | Urban/rural classification <sup>1</sup> | Average population <sup>2</sup> | Population density (persons/km <sup>2</sup> ) | Total cases (2001-2016) | Mean raw annual incidence rate* | Mean smoothed annual incidence rate* |
|-----------------------|----------------|-----------------------------------------|---------------------------------|-----------------------------------------------|-------------------------|---------------------------------|--------------------------------------|
| Noosa Shire           | Kin Kin        | Rural Balance                           | 670                             | 7                                             | 19                      | 177                             | 183                                  |
| Brisbane City         | Fairfield      | Major Urban                             | 859                             | 725                                           | 24                      | 175                             | 139                                  |
| Scenic Rim Region     | Roadvale       | Rural Balance                           | 251                             | 14                                            | 7                       | 175                             | 99                                   |
| Scenic Rim Region     | Harrisville    | Rural Balance                           | 537                             | 17                                            | 15                      | 174                             | 132                                  |
| Brisbane City         | Pinkenba       | Major Urban                             | 323                             | 23                                            | 9                       | 174                             | 0                                    |
| Sunshine Coast Region | Doonan         | Other Urban                             | 3,032                           | 94                                            | 84                      | 173                             | 168                                  |
| Sunshine Coast Region | Coochin Creek  | Rural Balance                           | 74                              | 1                                             | 2                       | 170                             | 95                                   |
| Scenic Rim Region     | Kalbar         | Rural Balance                           | 958                             | 30                                            | 26                      | 170                             | 155                                  |
| Scenic Rim Region     | Canungra       | Rural Balance                           | 1,077                           | 36                                            | 29                      | 168                             | 153                                  |
| Scenic Rim Region     | Innisplain     | Rural Balance                           | 75                              | 3                                             | 2                       | 168                             | 57                                   |
| Ipswich City          | Purga          | Rural Balance                           | 505                             | 9                                             | 13                      | 161                             | 154                                  |
| Scenic Rim Region     | Mount Walker   | Rural Balance                           | 117                             | 4                                             | 3                       | 160                             | 93                                   |
| Gold Coast City       | Jacobs Well    | Other Urban                             | 1,612                           | 119                                           | 41                      | 159                             | 149                                  |
| Brisbane City         | Koorngal       | Rural Balance                           | 39                              | 249                                           | 1                       | 158                             | 72                                   |
| Moreton Bay Region    | Closeburn      | Rural Balance                           | 521                             | 44                                            | 13                      | 156                             | 106                                  |
| Scenic Rim Region     | Moorang        | Rural Balance                           | 40                              | 1                                             | 1                       | 155                             | 88                                   |
| Scenic Rim Region     | Coleyville     | Rural Balance                           | 162                             | 4                                             | 4                       | 154                             | 135                                  |
| Moreton Bay Region    | Laceys Creek   | Rural Balance                           | 244                             | 3                                             | 6                       | 154                             | 109                                  |
| Redland City          | Russell Island | Other Urban                             | 2,486                           | 142                                           | 61                      | 153                             | 0                                    |
| Sunshine Coast Region | Eudlo          | Rural Balance                           | 979                             | 49                                            | 24                      | 153                             | 113                                  |
| Moreton Bay Region    | Mount Pleasant | Rural Balance                           | 291                             | 8                                             | 7                       | 150                             | 116                                  |
| Sunshine Coast Region | Verrierdale    | Rural Balance                           | 679                             | 23                                            | 16                      | 147                             | 139                                  |
| Moreton Bay Region    | Ocean View     | Rural Balance                           | 820                             | 21                                            | 19                      | 145                             | 99                                   |

<sup>1</sup> Based on ASGS classification of urban and rural, available from the Australian Bureau of Statistics.

<sup>2</sup> Based on census data, available from the Australian Bureau of Statistics.

\* per 100,000 population
