# Supplementary material for: Spatial and temporal patterns of Ross River virus in south east Queensland, Australia: identification of hot spots at the rural-urban interface
Source: PubMed Central journal article supplement (PMC7530966; doi:10.1186/s12879-020-05411-x), 2020-10-02
Supplement: 12879_2020_5411_MOESM7_ESM.pdf [file 12879_2020_5411_MOESM7_ESM.pdf]

**Table S7. Summary of 45 persistent hot spots identified in both raw and smoothed incidence analyses from 2001-2016.**

| LGA name              | SSC name              | Urban/rural category | Total cases | 2001 | 2002 | 2003 | 2004 | 2005 | 2006 | 2007 | 2008 | 2009 | 2010 | 2011 | 2012 | 2013 | 2014 | 2015 | 2016 | Total hot spot years |
|-----------------------|-----------------------|----------------------|-------------|------|------|------|------|------|------|------|------|------|------|------|------|------|------|------|------|----------------------|
| Sunshine Coast Region | Doonan                | Other Urban          | 84          | 0    | 1    | 1    | 0    | 1    | 0    | 0    | 0    | 1    | 1    | 0    | 1    | 0    | 1    | 0    | 0    | 7                    |
| Noosa Shire           | Tewantin              | Major Urban          | 167         | 0    | 0    | 1    | 0    | 1    | 0    | 0    | 1    | 0    | 1    | 0    | 0    | 0    | 1    | 0    | 0    | 5                    |
| Noosa Shire           | Cooroy                | Rural Balance        | 142         | 0    | 0    | 1    | 0    | 0    | 0    | 0    | 0    | 1    | 0    | 0    | 1    | 1    | 1    | 0    | 0    | 5                    |
| Noosa Shire           | Noosaville            | Major Urban          | 98          | 0    | 0    | 1    | 0    | 1    | 0    | 0    | 0    | 1    | 1    | 0    | 0    | 0    | 1    | 0    | 0    | 5                    |
| Sunshine Coast Region | Eumundi               | Rural Balance        | 75          | 0    | 0    | 1    | 0    | 1    | 0    | 0    | 1    | 0    | 0    | 0    | 0    | 0    | 1    | 0    | 1    | 5                    |
| Noosa Shire           | Cooribah              | Rural Balance        | 40          | 0    | 0    | 1    | 0    | 1    | 0    | 0    | 0    | 0    | 1    | 0    | 0    | 1    | 1    | 0    | 0    | 5                    |
| Noosa Shire           | Boreen Point          | Rural Balance        | 19          | 0    | 0    | 1    | 0    | 1    | 0    | 0    | 0    | 0    | 1    | 0    | 1    | 0    | 0    | 0    | 1    | 5                    |
| Sunshine Coast Region | Verrierdale           | Rural Balance        | 16          | 0    | 0    | 1    | 0    | 1    | 0    | 1    | 0    | 0    | 0    | 0    | 0    | 0    | 1    | 0    | 1    | 5                    |
| Noosa Shire           | Cootharaba            | Rural Balance        | 15          | 0    | 0    | 1    | 0    | 0    | 0    | 0    | 0    | 1    | 1    | 0    | 1    | 0    | 1    | 0    | 0    | 5                    |
| Sunshine Coast Region | Yandina Creek         | Rural Balance        | 14          | 0    | 0    | 0    | 0    | 0    | 0    | 1    | 1    | 0    | 1    | 0    | 0    | 0    | 1    | 0    | 1    | 5                    |
| Noosa Shire           | Pomona                | Rural Balance        | 98          | 0    | 0    | 1    | 0    | 0    | 0    | 0    | 0    | 0    | 0    | 0    | 1    | 1    | 1    | 0    | 0    | 4                    |
| Sunshine Coast Region | Beerwah               | Other Urban          | 88          | 0    | 0    | 1    | 0    | 0    | 0    | 0    | 0    | 0    | 1    | 0    | 0    | 1    | 0    | 0    | 1    | 4                    |
| Noosa Shire           | Cooran                | Rural Balance        | 56          | 0    | 1    | 1    | 0    | 0    | 0    | 0    | 0    | 0    | 0    | 0    | 1    | 0    | 1    | 0    | 0    | 4                    |
| Sunshine Coast Region | Mooloolah Valley      | Other Urban          | 41          | 0    | 0    | 1    | 0    | 0    | 0    | 1    | 0    | 0    | 0    | 0    | 0    | 1    | 0    | 0    | 1    | 4                    |
| Sunshine Coast Region | Peregian Beach        | Major Urban          | 40          | 0    | 0    | 1    | 0    | 0    | 0    | 0    | 0    | 1    | 0    | 0    | 0    | 0    | 1    | 0    | 1    | 4                    |
| Sunshine Coast Region | Conondale             | Rural Balance        | 26          | 0    | 1    | 0    | 1    | 0    | 0    | 0    | 1    | 0    | 0    | 0    | 1    | 0    | 0    | 0    | 0    | 4                    |
| Noosa Shire           | Lake Macdonald        | Rural Balance        | 19          | 0    | 0    | 1    | 0    | 0    | 0    | 0    | 0    | 0    | 0    | 0    | 1    | 1    | 1    | 0    | 0    | 4                    |
| Sunshine Coast Region | North Arm             | Rural Balance        | 11          | 0    | 0    | 1    | 0    | 0    | 0    | 1    | 0    | 0    | 0    | 0    | 0    | 0    | 1    | 0    | 1    | 4                    |
| Noosa Shire           | Noosa North Shore     | Rural Balance        | 9           | 0    | 0    | 1    | 0    | 1    | 0    | 0    | 0    | 0    | 1    | 0    | 0    | 0    | 1    | 0    | 0    | 4                    |
| Noosa Shire           | Noosa Heads           | Major Urban          | 78          | 0    | 0    | 1    | 0    | 1    | 0    | 0    | 0    | 0    | 0    | 0    | 0    | 0    | 1    | 0    | 0    | 3                    |
| Sunshine Coast Region | Glass House Mountains | Other Urban          | 76          | 0    | 0    | 0    | 0    | 0    | 0    | 0    | 1    | 0    | 0    | 0    | 0    | 1    | 0    | 0    | 1    | 3                    |
| Sunshine Coast Region | Landsborough          | Other Urban          | 68          | 0    | 0    | 0    | 0    | 0    | 0    | 0    | 0    | 0    | 0    | 0    | 0    | 1    | 1    | 0    | 1    | 3                    |
| Moreton Bay Region    | Elimbah               | Other Urban          | 39          | 1    | 0    | 0    | 0    | 1    | 0    | 0    | 0    | 0    | 0    | 0    | 0    | 1    | 0    | 0    | 0    | 3                    |

| LGA name              | SSC name         | Urban/rural category | Total cases | 2001     | 2002     | 2003      | 2004     | 2005      | 2006     | 2007     | 2008      | 2009     | 2010      | 2011     | 2012      | 2013      | 2014      | 2015     | 2016      | Total hot spot years |
|-----------------------|------------------|----------------------|-------------|----------|----------|-----------|----------|-----------|----------|----------|-----------|----------|-----------|----------|-----------|-----------|-----------|----------|-----------|----------------------|
| Moreton Bay Region    | Dayboro          | Other Urban          | 34          | 0        | 0        | 1         | 0        | 0         | 0        | 0        | 0         | 0        | 0         | 0        | 0         | 1         | 0         | 1        | 0         | 3                    |
| Sunshine Coast Region | Maroochy River   | Other Urban          | 21          | 0        | 0        | 1         | 0        | 0         | 0        | 0        | 0         | 0        | 0         | 0        | 0         | 0         | 1         | 0        | 1         | 3                    |
| Noosa Shire           | Kin Kin          | Rural Balance        | 19          | 0        | 0        | 1         | 0        | 0         | 0        | 0        | 0         | 0        | 0         | 0        | 1         | 0         | 1         | 0        | 0         | 3                    |
| Sunshine Coast Region | Ninderry         | Rural Balance        | 14          | 0        | 0        | 0         | 0        | 0         | 0        | 1        | 1         | 0        | 0         | 0        | 0         | 0         | 1         | 0        | 0         | 3                    |
| Sunshine Coast Region | Beerburrum       | Rural Balance        | 10          | 1        | 0        | 0         | 0        | 0         | 0        | 0        | 1         | 0        | 0         | 0        | 0         | 1         | 0         | 0        | 0         | 3                    |
| Ipswich City          | Willowbank       | Rural Balance        | 9           | 0        | 0        | 0         | 0        | 0         | 0        | 0        | 1         | 1        | 0         | 0        | 0         | 0         | 0         | 1        | 0         | 3                    |
| Sunshine Coast Region | Valdora          | Rural Balance        | 6           | 0        | 0        | 0         | 0        | 0         | 0        | 0        | 1         | 0        | 0         | 0        | 0         | 0         | 1         | 0        | 1         | 3                    |
| Noosa Shire           | Pinbarren        | Rural Balance        | 5           | 0        | 0        | 1         | 0        | 0         | 0        | 0        | 0         | 0        | 0         | 0        | 1         | 0         | 1         | 0        | 0         | 3                    |
| Sunshine Coast Region | Coolum Beach     | Other Urban          | 111         | 0        | 0        | 0         | 0        | 0         | 0        | 0        | 0         | 0        | 0         | 0        | 0         | 0         | 1         | 0        | 1         | 2                    |
| Gold Coast City       | Ormeau           | Major Urban          | 90          | 1        | 0        | 0         | 0        | 0         | 0        | 1        | 0         | 0        | 0         | 0        | 0         | 0         | 0         | 0        | 0         | 2                    |
| Sunshine Coast Region | Yandina          | Other Urban          | 72          | 0        | 1        | 0         | 0        | 0         | 0        | 0        | 0         | 0        | 0         | 0        | 0         | 0         | 1         | 0        | 0         | 2                    |
| Gold Coast City       | Jacobs Well      | Other Urban          | 41          | 0        | 0        | 0         | 0        | 0         | 0        | 1        | 0         | 0        | 0         | 1        | 0         | 0         | 0         | 0        | 0         | 2                    |
| Sunshine Coast Region | Mount Coolum     | Other Urban          | 31          | 0        | 1        | 0         | 0        | 0         | 0        | 0        | 0         | 0        | 0         | 0        | 0         | 0         | 1         | 0        | 0         | 2                    |
| Sunshine Coast Region | Peregian Springs | Major Urban          | 20          | 0        | 0        | 0         | 0        | 0         | 0        | 0        | 0         | 0        | 0         | 0        | 0         | 0         | 1         | 0        | 1         | 2                    |
| Scenic Rim            | Harrisville      | Rural Balance        | 15          | 0        | 0        | 0         | 0        | 0         | 1        | 0        | 0         | 0        | 0         | 0        | 0         | 0         | 0         | 1        | 0         | 2                    |
| Noosa Shire           | Tinbeerwah       | Rural Balance        | 15          | 0        | 0        | 1         | 0        | 0         | 0        | 0        | 0         | 0        | 0         | 0        | 0         | 0         | 1         | 0        | 0         | 2                    |
| Ipswich City          | Purga            | Rural Balance        | 13          | 0        | 0        | 0         | 0        | 0         | 0        | 0        | 0         | 0        | 0         | 0        | 1         | 0         | 0         | 1        | 0         | 2                    |
| Moreton Bay Region    | Donnybrook       | Rural Balance        | 12          | 1        | 0        | 0         | 0        | 1         | 0        | 0        | 0         | 0        | 0         | 0        | 0         | 0         | 0         | 0        | 0         | 2                    |
| Noosa Shire           | Black Mountain   | Rural Balance        | 10          | 0        | 0        | 0         | 0        | 0         | 0        | 0        | 0         | 0        | 0         | 0        | 0         | 1         | 1         | 0        | 0         | 2                    |
| Ipswich City          | Walloon          | Rural Balance        | 7           | 0        | 0        | 0         | 0        | 0         | 0        | 0        | 1         | 0        | 1         | 0        | 0         | 0         | 0         | 0        | 0         | 2                    |
| Sunshine Coast Region | Mount Mellum     | Rural Balance        | 6           | 0        | 0        | 1         | 0        | 0         | 0        | 0        | 0         | 0        | 0         | 0        | 0         | 0         | 0         | 0        | 1         | 2                    |
| Sunshine Coast Region | Weyba Downs      | Major Urban          | 5           | 0        | 0        | 0         | 0        | 0         | 0        | 0        | 0         | 1        | 0         | 0        | 0         | 0         | 1         | 0        | 0         | 2                    |
| <b>Total</b>          |                  |                      | <b>1885</b> | <b>4</b> | <b>5</b> | <b>24</b> | <b>1</b> | <b>11</b> | <b>1</b> | <b>7</b> | <b>10</b> | <b>7</b> | <b>10</b> | <b>1</b> | <b>11</b> | <b>12</b> | <b>29</b> | <b>4</b> | <b>15</b> |                      |
